# Supplementary material for: Efficient and Fast Removal of Oils from Water Surfaces via Highly Oleophilic Polyurethane Composites
Source: MDPI journal article supplement (doi:10.3390/toxics9080186), 2021-08-05
Supplement: s1 [file s1]

Article

# Supplementary Material: Efficient and Fast Removal of Oils from Water Surfaces Via Highly Oleophilic Polyurethane Composites

Antonio De Nino \*, Fabrizio Olivito \*, Vincenzo Algieri, Paola Costanzo, Antonio Jiritano, Matteo Antonio Tallarida and Loredana Maiuolo \*

## 1. Freundlich Isotherms

(a)

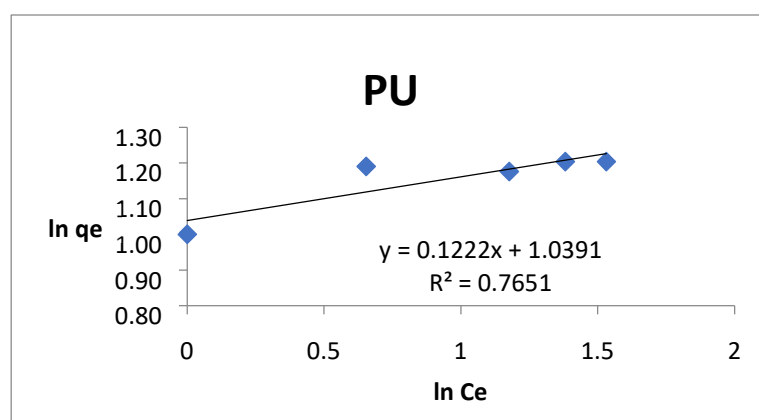

(b)

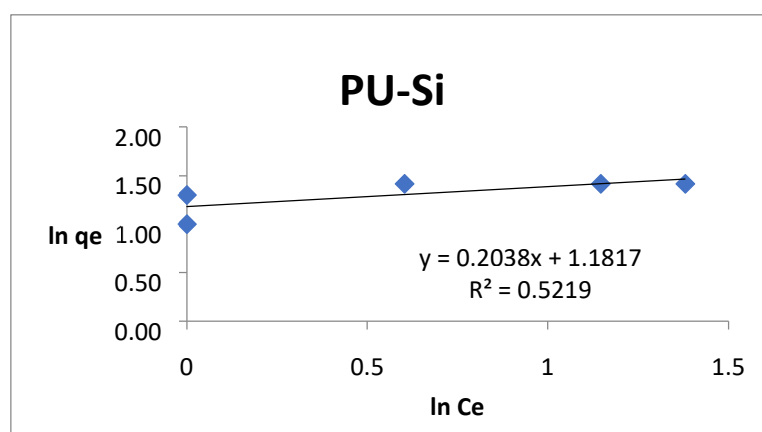

(c)

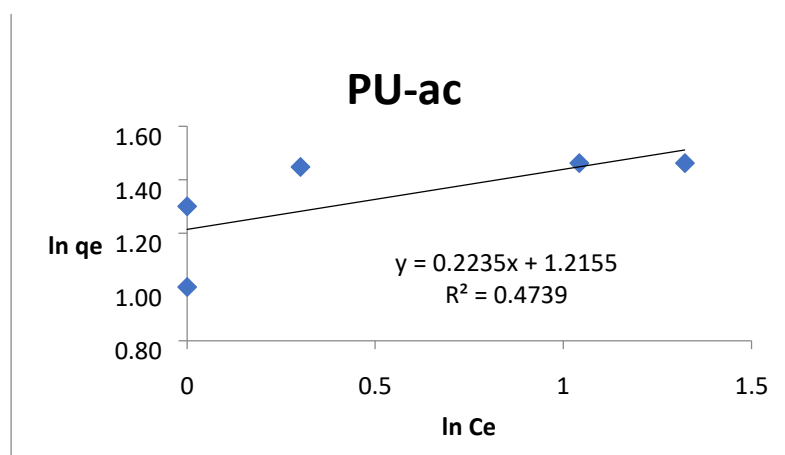

**Figure S1.** (a) Freundlich plot for PU 1; (b) Freundlich plot for PU-Si 2; (c) Freundlich plot for PU-ac 3.

Freundlich isotherm:

$$\ln q_e = \ln k_F + \frac{1}{n} \ln C_e \quad (1)$$

where  $C_e$  (mg/L) is the concentration of adsorbate in the liquid phase at equilibrium and  $q_e$  (mg/g) is the amount of adsorbate adsorbed on the solid phase at equilibrium.  $k_F$  (mg/g)  $(\text{L/mg})^{1/n}$  indicates the adsorption capacity, and  $n$  reflects the intensity of adsorption according to the Freundlich theory.

## 2. Langmuir Dimensionless Constant

One of the essential characteristics of the Langmuir isotherm can be expressed by a dimensionless constant, separation factor,  $R_L$ , defined as follows:

$$R_L = \frac{1}{1 + k_L C_0} \quad (2)$$

The value of  $R_L$  indicates the type of the isotherm, which is unfavorable ( $R_L > 1$ ), linear ( $R_L = 1$ ), favorable ( $0 < R_L < 1$ ) or irreversible ( $R_L = 0$ ).

In the following Table we report the  $R_L$  values for each starting concentration of oil used:

**Table S1.**  $R_L$  values at several initial concentrations.

| $C_0$ | $R_L$ PU | $R_L$ PU-Si | $R_L$ PU-ac |
|-------|----------|-------------|-------------|
| 10    | 0.06     | 0.12        | 0.08        |
| 20    | 0.03     | 0.06        | 0.04        |
| 30    | 0.02     | 0.04        | 0.03        |
| 40    | 0.02     | 0.03        | 0.02        |
| 50    | 0.01     | 0.03        | 0.02        |

### 3. FT-IR Spectra

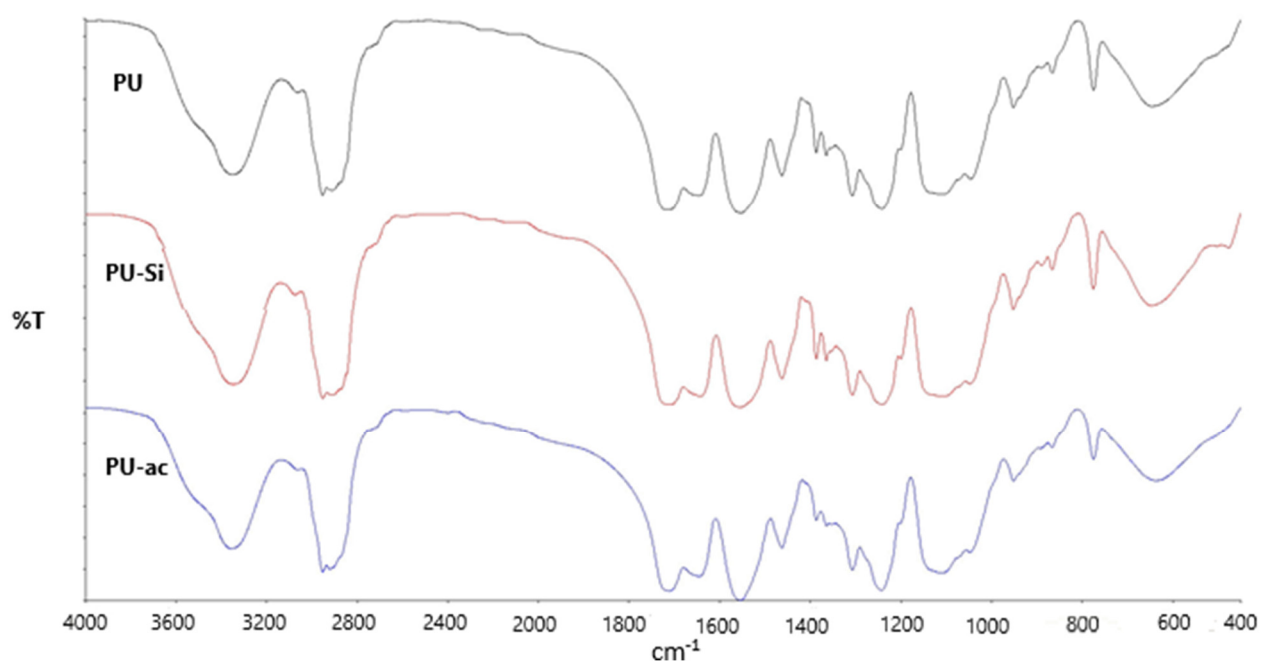

Figure S2. FT-IR spectra of 1–3.

### References

1. Kumari, S.; Chauhan, G.S.; Ahn, J.H. Novel cellulose nanowhiskers-based polyurethane foam for rapid and persistent removal of methylene blue from its aqueous solutions. *Chem. Eng. J.* **2016**, *304*, 728–736.
